# Supplementary material
Source: ML conference proceedings conference paper supplement (https://proceedings.neurips.cc/paper_files/paper/2014/hash/5705e1164a8394aace6018e27d20d237-Abstract.html)
Supplement: Supplementary file [file 5705e1164a8394aace6018e27d20d237-Supplemental.zip]

## A Detailed LAP Derivation

This section gives a detailed derivation of Equation 7 from the main body of the paper. We fix a particular clique of interest  $q \in \mathcal{C}$  and select a neighbourhood  $\mathcal{A}_q$  as in Mizrahi *et al.* [19] to be the union of all cliques of  $\mathcal{G}$  that intersect with the clique of interest

$$\mathcal{A}_q = \bigcup_{c \cap q \neq \emptyset} c.$$

We are then interested in writing an expression for the marginal  $p(\mathbf{x}_{\mathcal{A}_q} | \boldsymbol{\theta})$  in terms of the joint distribution over the full graph,  $p(\mathbf{x}_{\mathcal{V}} | \boldsymbol{\theta})$ . Our choice of  $\mathcal{A}_q$  partitions the clique system  $\mathcal{C}$  into two parts

$$\begin{aligned} \mathcal{C}^{in} &= \{c \subseteq \mathcal{A}_q \mid c \in \mathcal{C}\} \\ \mathcal{C}^{out} &= \{c \not\subseteq \mathcal{A}_q \mid c \in \mathcal{C}\} \end{aligned}$$

In particular, note that  $q \in \mathcal{C}^{in}$ . With the clique system partitioned in this way we can write the marginal as follows

$$\begin{aligned} p(\mathbf{x}_{\mathcal{A}_q} | \boldsymbol{\theta}) &= \frac{1}{Z(\boldsymbol{\theta})} \sum_{\mathbf{x}_{\mathcal{V} \setminus \mathcal{A}_q}} \exp \left( - \sum_{c \in \mathcal{C}} E(\mathbf{x}_c | \boldsymbol{\theta}_c) \right) \\ &= \frac{1}{Z(\boldsymbol{\theta})} \sum_{\mathbf{x}_{\mathcal{V} \setminus \mathcal{A}_q}} \exp \left( -E(\mathbf{x}_q | \boldsymbol{\theta}_q) - \sum_{c \in \mathcal{C}^{in} \setminus \{q\}} E(\mathbf{x}_c | \boldsymbol{\theta}_c) - \sum_{c \in \mathcal{C}^{out}} E(\mathbf{x}_c | \boldsymbol{\theta}_c) \right) \\ &= \frac{1}{Z(\boldsymbol{\theta})} \exp \left( -E(\mathbf{x}_q | \boldsymbol{\theta}_q) - \sum_{c \in \mathcal{C}^{in} \setminus \{q\}} E(\mathbf{x}_c | \boldsymbol{\theta}_c) \right) \sum_{\mathbf{x}_{\mathcal{V} \setminus \mathcal{A}_q}} \exp \left( - \sum_{c \in \mathcal{C}^{out}} E(\mathbf{x}_c | \boldsymbol{\theta}_c) \right) \end{aligned}$$

where the final equality follows from the fact that the first summation contains only cliques whose intersection with  $\mathbf{x}_{\mathcal{V} \setminus \mathcal{A}_q}$  is empty.

With some loss of notational precision we can evaluate the sum over the remaining terms

$$p(\mathbf{x}_{\mathcal{A}_q} | \boldsymbol{\theta}) = \frac{1}{Z(\boldsymbol{\theta})} \exp \left( -E(\mathbf{x}_q | \boldsymbol{\theta}_q) - \sum_{c \in \mathcal{C}^{in} \setminus \{q\}} E(\mathbf{x}_c | \boldsymbol{\theta}_c) \right) \exp \left( - \sum_{c \in \mathcal{C}_q^{out}} E(\mathbf{x}_c | \boldsymbol{\theta}_{\mathcal{V} \setminus q}) \right)$$

Here we have made two replacements:

1.  $\mathcal{C}^{out}$  has been replaced with  $\mathcal{C}_q^{out}$ , where  $\mathcal{C}_q^{out}$  is used to mean whatever clique system arises by summing the final term over  $\mathbf{x}_{\mathcal{V} \setminus \mathcal{A}_q}$ . Computing the exact structure of  $\mathcal{C}_q^{out}$  is in general a hard problem, but for our purposes it suffices to know that  $\mathcal{C}_q^{out}$  does not contain  $q$ , which is clear since all cliques in  $\mathcal{C}^{out}$  are disjoint from  $q$  by construction.
2. Each potential function in the second term now depends on  $\boldsymbol{\theta}_{\mathcal{V} \setminus q}$ . Figuring out exactly which cliques depend on which parameters would require us to compute the structure of  $\mathcal{C}_q^{out}$ ; however, we require only that none of the cliques in the second term depend on  $\boldsymbol{\theta}_q$ , which we know since this term does not contain  $\boldsymbol{\theta}_q$ .

Finally, by letting  $\mathcal{C}_q = (\mathcal{C}^{in} \setminus \{q\}) \cup \mathcal{C}_q^{out}$  we can write this equation in a more compact way,

$$p(\mathbf{x}_{\mathcal{A}_q} | \boldsymbol{\theta}) = \frac{1}{Z(\boldsymbol{\theta})} \exp \left( -E(\mathbf{x}_q | \boldsymbol{\theta}_q) - \sum_{c \in \mathcal{C}_q \setminus \{q\}} E(\mathbf{x}_c | \boldsymbol{\theta}_c) \right)$$

which corresponds to the form shown in Equation 7.
